# Supplementary material for: COVID-19 vaccine acceptance and perceived risk among pregnant and non-pregnant adults in Cameroon, Africa
Source: PubMed Central journal article supplement (PMC9469991; doi:10.1371/journal.pone.0274541), 2022-09-13
Supplement: pone.0274541.s001.pdf [file pone.0274541.s001.pdf]

**Survey about COVID-19 Vaccination in Cameroon**

Date of Survey (DD/MM/YY) \_\_\_\_\_ Initials of Person Administering Survey \_\_\_\_\_

+++++

- 1) Personal information:
  - a. Age (in years) \_\_\_\_\_
  - b. Gender (Male/Female) (circle one)
  - c. Town of residence \_\_\_\_\_ (write in)
  - d. Highest level of Educational completed (none, Primary, Secondary, University) (circle one)
  - e. Are you currently pregnant (YES/NO)
- 2) Do you have any long-term medical problems? (YES/NO) (such as cancer, diabetes, heart disease, high blood pressure, asthma, anemia, other problem) (if yes, circle all that apply)
- 3) Have you ever heard of Coronavirus-19 or COVID-19? (YES/NO)
- 4) Do you think COVID-19 is in Cameroon? (YES/NO)
- 5) Have you had a COVID-19 test? (YES/NO)
  - a. If yes, what was the result? (POSITIVE/NEGATIVE/AWAITING RESULTS)
- 6) Do you know anyone who has or who had COVID-19 infection? (YES/NO)
- 7) Do you know anyone who died of COVID-19? (YES/NO)
- 8) Are you worried about getting COVID-19? (YES/NO)
- 9) Are you worried about your family or friends getting COVID-19? (YES/NO)
- 10) Have you ever been vaccinated for any type of illness in the past? (YES/NO)
- 11) Do you have children? (YES/NO)
  - a. If you have children, have they ever received any vaccines for any type of illness? (YES/NO)
- 12) Have you heard of a vaccine for COVID-19? (YES/NO)
  - a. If yes, do you think the COVID-19 vaccine works? (YES/NO)
  - b. If yes, have you heard of any risks of the COVID-19 vaccine? (YES/NO)
    - i. (if YES, write in) \_\_\_\_\_
- 13) Is COVID-19 vaccine currently available anywhere in your region? (YES/NO)
- 14) If you were offered a COVID-19 vaccine today, would you take it? (circle one on the scale below)
  - a) Definitely Yes      b) Maybe      c) Not sure      d) Definitely No
- 15) If you have children, would you accept a COVID-19 vaccine for them if it was available today? (circle one)
  - a) Definitely Yes      b) Maybe      c) Not sure      d) Definitely No

16) If the COVID-19 vaccine was produced in Africa, would you be more likely to take it? (circle one)

- a) Definitely Yes      b) Maybe      c) Not sure      d) Definitely No

17) Do you think that more information would encourage people in Cameroon to take the vaccine? (circle)

- a) Definitely Yes      b) Maybe      c) Not sure      d) Definitely No

18) If you think more information may help, what type of information would be most helpful? (choose any)

- a. what is in the vaccine
- b. how the vaccine works
- c. vaccine safety and vaccine side effects
- d. the company and country where the vaccine was made
- e. other information (please list) \_\_\_\_\_

19) Where do you get your information about health? (list top 3 in order as 1, 2, 3)

- a. At the hospital or medical clinic \_\_\_\_\_
- b. At school \_\_\_\_\_
- c. Ministry of Health Resources \_\_\_\_\_
- d. Newspapers and books \_\_\_\_\_
- e. Other (please list) \_\_\_\_\_
- f. Radio \_\_\_\_\_
- g. Talking to Friends and Family \_\_\_\_\_
- h. Social Media \_\_\_\_\_
- i. Pastor/Priest/Clergy \_\_\_\_\_
- j. Herbalist/Traditional Healer \_\_\_\_\_

20) Who do you trust the most for providing truthful information about health for you and your family? (list top 3 in order as 1, 2, 3)

- a. Doctors and/or nurses \_\_\_\_\_
- b. Scientists \_\_\_\_\_
- c. Ministry of Health Officials \_\_\_\_\_
- d. Community Leaders \_\_\_\_\_
- e. Journalists \_\_\_\_\_
- f. Herbalist/Traditional Healer \_\_\_\_\_
- g. Friends and Family \_\_\_\_\_
- h. Pastor/Priest/Clergy \_\_\_\_\_
- i. Other \_\_\_\_\_

21) Do you agree or disagree with these four statements (circle one)

- a. The COVID-19 vaccine in Africa is not as effective as the COVID-19 vaccine in Europe (AGREE/DISAGREE/NOT SURE)
- b. The COVID-19 vaccine causes infertility in women (AGREE/DISAGREE/NOT SURE)
- c. The COVID-19 vaccine available in Cameroon is not safe to take (AGREE/DISAGREE/NOT SURE)
- d. Receiving the COVID-19 vaccine during pregnancy can cause harm to the baby (AGREE/DISAGREE/NOT SURE)

**Thank you for taking the time to answer these questions today. We are grateful for your time and your responses to help us improve health in Cameroon!**
